# Supplementary material for: Significant and differential acceleration of dephosphorylation of the insecticides, paraoxon and parathion, caused by alkali metal ethoxidesElectronic Supplementary Information (ESI) available: kinetic data. See http://www.rsc.org/suppdata/cc/b3/b310055c/
Source: Royal Society of Chemistry journal article supplement (doi:10.1039/b310055c), 2003-01-01
Supplement: b310055c.doc [file b310055c.doc]

# Electronic Supplementary Information

Significant and differential acceleration of dephosphorylation of the insecticides, paraoxon and parathion, caused by alkali metal ethoxides

Ik-Hwan Um,* Sang-Eun Jeon, Mi-Hwa Baek , and Hye-Ran Park

Department of Chemistry, Ewha Womans University, Seoul 120-750, Korea

Table S1. Kinetic data for the reaction of paraoxon (**1a**) with EtO-M+ in anhydrous EtOH at 25.0 ± 0.1℃.

| 102 [EtO-Li+]/ M | 103 *k*obs/ s-1 | 102 [EtO-Na+]/M | 103 *k*obs/ s-1 | 102 [EtO-K+]/ M | 103 *k*obs/ s-1 |
| --- | --- | --- | --- | --- | --- |
| 0.458 | 0.0821 | 0.818 | 0.0963 | 0.909 | 0.0884 |
| 1.25 | 0.305 | 1.42 | 0.217 | 1.67 | 0.191 |
| 1.60 | 0.414 | 1.82 | 0.314 | 2.31 | 0.299 |
| 2.22 | 0.587 | 2.51 | 0.45 | 2.86 | 0.384 |
| 2.75 | 0.821 | 3.63 | 0.75 | 3.33 | 0.468 |
| 3.21 | 0.976 | 5.26 | 1.13 | 4.00 | 0.578 |
| 3.85 | 1.23 | 7.01 | 1.60 | 4.83 | 0.732 |
| 4.64 | 1.5 | 8.72 | 2.09 | 6.43 | 1.02 |
| 6.18 | 2.09 | - | - | 8.00 | 1.38 |
| 7.70 | 2.70 | - | - | 10.0 | 1.77 |

Table S2. Kinetic data for the reaction of paraoxon (**1a**) with EtO-K+ in the presence of excess 18-crown-6-ether (18C6) in anhydrous EtOH at 25.0 ± 0.1℃. [18C6]/[EtO-K+]0 = 5.0

| 102 [EtO-K+]/ M | 104 *k*obs/ s-1 |
| --- | --- |
| 0.909 | 0.313 |
| 1.67 | 0.531 |
| 2.31 | 0.742 |
| 2.86 | 0.940 |
| 3.33 | 1.08 |
| 4.00 | 1.31 |
| 4.83 | 1.57 |

Table S3. Ion-pairing treatment of the kinetic data for the reaction of paraoxon (**1a**) with EtO-M+ in anhydrous EtOH at

25.0 ± 0.1℃

| EtO-Li+ | | EtO-Na+ | | EtO-K+ | |
| --- | --- | --- | --- | --- | --- |
| 102 *k*obs/[EtO-] M-1s-1 | 102 [EtO-]/ M | 102 *k*obs/[EtO-]M-1s-1 | 102 [EtO-]/ M | 102 *k*obs/[EtO-] M-1s-1 | 102 [EtO-]/ M |
| 2.83 | 0.285 | 2.76 | 0.787 | 1.49 | 0.593 |
| 5.33 | 0.567 | 3.37 | 0.933 | 2.08 | 0.916 |
| 6.18 | 0.664 | 1.87 | 0.531 | 2.62 | 1.14 |
| 7.16 | 0.814 | 3.90 | 1.15 | 2.93 | 1.31 |
| 8.8 | 0.927 | 4.89 | 1.46 | 3.24 | 1.45 |
| 9.55 | 1.02 | 6.17 | 1.83 | 3.56 | 1.63 |
| 10.85 | 1.13 | 7.35 | 2.18 | 4.01 | 1.83 |
| 11.85 | 1.26 | 8.45 | 2.48 | 4.70 | 2.17 |
| 13.95 | 1.49 | - | - | 5.57 | 2.48 |
| 15.35 | 1.68 | - | - | 6.27 | 2.82 |
| *K*a*k*EtOLi = 9.21±0.18 M-2s-1 | | *K*a*k*EtONa = 3.32±0.04 M-2s-1 | | *K*a*k*EtOK= 2.16±0.03 M-2s-1 | |
| *k*EtO-= (1.24±0.192)×10-3 M-1s-1 | | *k*EtO-= (1.29±0.069)×10-3 M-1s-1 | | *k*EtO- = (1.22±0.062)×10-3 M-1s-1 | |

Table S4. Kinetic data for the reaction of parathion (**1b**) with EtO-M+ in anhydrous EtOH at 25.0 ± 0.1℃.

| 102 [EtO-Li+]/ M | 106 *k*obs/ s-1 | 102 [EtO-Na+]/ M | 106 *k*obs/ s-1 | 102 [EtO-K+]/ M | 106 *k*obs/ s-1 |
| --- | --- | --- | --- | --- | --- |
| 1.47 | 0.528 | 0.991 | 0.43 | 0.909 | 0.49 |
| 1.83 | 0.643 | 1.82 | 0.78 | 1.67 | 0.897 |
| 2.13 | 0.721 | 2.52 | 1.06 | 2.31 | 1.23 |
| 3.08 | 1.02 | 3.11 | 1.29 | 2.86 | 1.55 |
| 3.65 | 1.19 | 4.36 | 1.78 | 3.33 | 1.84 |
| 4.11 | 1.33 | 5.26 | 2.11 | 4.00 | 2.25 |
| 5.11 | 1.59 | 6.23 | 2.46 | 4.83 | 2.68 |
| 6.39 | 1.92 | 7.01 | 2.71 | 5.71 | 3.26 |

Table S5. Kinetic data for the reaction of parathion (**1b**) with EtO-K+ in the presence of excess 18-corwn-

6-ether (18C6) in anhydrous EtOH at 25.0 ± 0.1℃. ([18C6]/[EtO-K+]o = 5.0)

| 102 [EtO-K+]/ M | 106 *k*obs/ s-1 |
| --- | --- |
| 0.909 | 0.523 |
| 1.67 | 0.865 |
| 2.31 | 1.23 |
| 3.33 | 1.7 |
| 4.00 | 1.99 |
| 4.83 | 2.53 |

Table S6. Ion-pairing treatment of the kinetic data for the reaction of parathion (**1b**) with EtO-M+ in anhydrous EtOH at 25.0 ± 0.1℃

| EtO-Li+ | | EtO-Na+ | | EtO-K+ | |
| --- | --- | --- | --- | --- | --- |
| 104 *k*obs/[EtO-] M-1s-1 | 102 [EtO-]/ M | 104 *k*obs/[EtO-] M-1s-1 | 102 [EtO-]/M | 104 *k*obs/[EtO-] M-1s-1 | 102 [EtO-]/M |
| 0.839 | 0.630 | 0.704 | 0.611 | 0.827 | 0.593 |
| 0.890 | 0.723 | 0.836 | 0.933 | 0.980 | 0.916 |
| 0.908 | 0.794 | 0.917 | 1.16 | 1.08 | 1.14 |
| 1.028 | 0.920 | 0.975 | 1.32 | 1.18 | 1.31 |
| 1.085 | 1.10 | 1.09 | 1.64 | 1.27 | 1.45 |
| 1.13 | 1.18 | 1.15 | 1.83 | 1.39 | 1.63 |
| 1.19 | 1.34 | 1.21 | 2.03 | 1.47 | 1.83 |
| 1.27 | 1.52 | 1.25 | 2.18 | 1.61 | 2.02 |
| *K*a*k*EtOLi = (4.96±0.15)×10-3 M-2s-1 | | *K*a*k*EtONa = (3.47±0.08)×10-3 M-2s-1 | | *K*a*k*EtOK = (5.50±0.16)×10-3 M-2s-1 | |
| *k*EtO-= (5.30±0.15)×10-5 M-1s-1 | | *k*EtO-= (5.09±0.13)×10-5 M-1s-1 | | *k*EtO- = (4.78±0.25)×10-5 M-1s-1 | |

Fig. S1. Plot of log *k*EtOM/*k*EtO- vs. 1/*r* for the reactions of paraoxon(**1a**) with EtO-M+ in anhydrous EtOH at 25.0oC.
